1           **Immunoinformatic identification of B cell and T cell epitopes in the SARS-CoV-2 proteome**

2           Stephen N. Crooke, Inna G. Ovsyannikova, Richard B. Kennedy, Gregory A. Poland\*

3           Mayo Clinic Vaccine Research Group, Mayo Clinic, Rochester, MN USA

4

5   Correspondence:

6   Gregory A. Poland, M.D., Director – Vaccine Research Group, Mayo Clinic, Guggenheim Building  
7   611C, 200 First Street SW, Rochester, MN 55905 USA

8   Phone: (507) 284-4968; E-mail: [poland.gregory@mayo.edu](mailto:poland.gregory@mayo.edu)

9

10

11

12

13

14

15

16

17

18

19

20

21

22

23

24

25

26

27

28 **Abstract**

29 A novel coronavirus (SARS-CoV-2) emerged from China in late 2019 and rapidly spread across  
30 the globe, infecting millions of people and generating societal disruption on a level not seen since the  
31 1918 influenza pandemic. A safe and effective vaccine is desperately needed to prevent the continued  
32 spread of SARS-CoV-2; yet, rational vaccine design efforts are currently hampered by the lack of  
33 knowledge regarding viral epitopes targeted during an immune response, and the need for more in-depth  
34 knowledge on betacoronavirus immunology. To that end, we developed a computational workflow using  
35 a series of open-source algorithms and webtools to analyze the proteome of SARS-CoV-2 and identify  
36 putative T cell and B cell epitopes. Using increasingly stringent selection criteria to select peptides with  
37 significant HLA promiscuity and predicted antigenicity, we identified 41 potential T cell epitopes (5 HLA  
38 class I, 36 HLA class II) and 6 potential B cell epitopes, respectively. Docking analysis and binding  
39 predictions demonstrated enrichment for peptide binding to HLA-B (class I) and HLA-DRB1 (class II)  
40 molecules. Overlays of predicted B cell epitopes with the structure of the viral spike (S) glycoprotein  
41 revealed that 4 of 6 epitopes were located in the receptor-binding domain of the S protein. To our  
42 knowledge, this is the first study to comprehensively analyze all 10 (structural, non-structural and  
43 accessory) proteins from SARS-CoV-2 using predictive algorithms to identify potential targets for  
44 vaccine development.

45 **Keywords:** Coronavirus; immunoinformatics; T-cell epitope; B-cell epitope; HLA molecules, HLA class  
46 I, HLA class II, peptide

47 **Significance Statement:**

48 The novel coronavirus SARS-CoV-2 recently emerged from China, rapidly spreading and ushering in a  
49 global pandemic. Despite intensive research efforts, our knowledge of SARS-CoV-2 immunology and the  
50 proteins targeted by the immune response remains relatively limited, making it difficult to rationally  
51 design candidate vaccines. We employed a suite of bioinformatic tools, computational algorithms, and  
52 structural modeling to comprehensively analyze the entire SARS-CoV-2 proteome for potential T cell and  
53 B cell epitopes. Utilizing a set of stringent selection criteria to filter peptide epitopes, we identified 41 T  
54 cell epitopes (5 HLA class I, 36 HLA class II) and 6 B cell epitopes that could serve as promising targets  
55 for peptide-based vaccine development against this emerging global pathogen.

56

57

58

## 59 **Introduction**

60 In December 2019, public health officials in Wuhan, China, reported the first case of severe  
61 respiratory disease attributed to infection with the novel coronavirus SARS-CoV-2 (1). Since its  
62 emergence, SARS-CoV-2 has spread rapidly via human-to-human transmission (2), threatening to  
63 overwhelm healthcare systems around the world and resulting in the declaration of a pandemic by the  
64 World Health Organization (3). The disease caused by the virus (COVID-19) is characterized by fever,  
65 pneumonia, and other respiratory and inflammatory symptoms that can result in severe inflammation of  
66 lung tissue and ultimately death—particularly among older adults or individuals with underlying  
67 comorbidities (4-6). As of this writing, the SARS-CoV-2 pandemic has resulted in 4 million confirmed  
68 cases of COVID-19 and over 280,000 deaths worldwide (7).

69 SARS-CoV-2 is the third pathogenic coronavirus to cross the species barrier into humans in the  
70 past two decades, preceded by severe acute respiratory syndrome coronavirus (SARS-CoV) (8, 9) and  
71 Middle-East respiratory syndrome coronavirus (MERS-CoV) (10). All three of these viruses belong to the  
72  $\beta$ -coronavirus genus and have either been confirmed (SARS-CoV) or suggested (MERS-CoV, SARS-  
73 CoV-2) to originate in bats, with transmission to humans occurring through intermediary animal hosts  
74 (11-14). While previous zoonotic spillovers of coronaviruses have been marked by high case fatality rates  
75 (~10% for SARS-CoV; ~34% for MERS-CoV), widespread transmission of disease has been relatively  
76 limited (8,098 cases of SARS; 2,494 cases of MERS) (15). In contrast, SARS-CoV-2 is estimated to have  
77 a lower case fatality rate (~2-4%) but is far more infectious and has achieved world-wide spread in a  
78 matter of months (16).

79 As the number of COVID-19 cases continues to grow, there is an urgent need for a safe and  
80 effective vaccine to combat the spread of SARS-CoV-2 and reduce the burden on hospitals and healthcare  
81 systems. No licensed vaccine or therapeutic is currently available for SARS-CoV-2, although there are  
82 over 100 vaccine candidates reportedly in development worldwide. Seven vaccine candidates have  
83 rapidly progressed into Phase I/II clinical trials: adenoviral vector-based vaccines (CanSino Biologics,  
84 ChiCTR2000030906; University of Oxford, NCT04324606), nucleic-acid based vaccines encoding for  
85 the viral spike (S) protein (Moderna, NCT04283461; Inovio Pharmaceuticals, NCT04336410;  
86 BioNTech/Pfizer, 2020-001038-36), and inactivated virus formulations (Sinopharm,  
87 ChiCTR2000031809; Sinovac (NCT04352608) (17). While the advancement of these vaccine candidates  
88 into clinical testing is promising, it is imperative they meet stringent endpoints for safety (18). Preclinical  
89 studies of multiple experimental SARS-CoV vaccines have reported a Th2-type immunopathology in the  
90 lungs of vaccinated mice following viral challenge, suggesting hypersensitization of the immune response  
91 against certain viral proteins (19-22). Similarly, a modified vaccinia virus Ankara vector expressing the  
92 SARS-CoV S protein induced significant hepatitis in immunized ferrets (23). These data suggest that

93 candidate coronavirus vaccines that limit the inclusion of whole viral proteins may have more beneficial  
94 safety profiles.

95 The SARS-CoV-2 genome encodes for 10 unique protein products: 4 structural proteins (surface  
96 glycoprotein (S), envelope (E), membrane (M), nucleocapsid (N)); 5 non-structural proteins (open reading  
97 frame (ORF)3a, ORF6, ORF7a, ORF8, ORF10); and 1 non-structural polyprotein (ORF1ab) (**Figure 1A,**  
98 **B**) (24). It is currently unknown which epitopes in the SARS-CoV-2 proteome are recognized by the  
99 human immune system, although studies of SARS-CoV immune responses suggest that both cellular and  
100 humoral responses against structural proteins mediate protection against disease (19, 22, 25-27). It is  
101 likely that cellular immune responses against non-structural viral proteins also play a key role in  
102 orchestrating protective antiviral immunity (28-30). In lieu of biological data, immunoinformatic  
103 algorithms can be employed to predict peptide epitopes based on amino acid properties and known human  
104 leukocyte antigen (HLA) binding profiles (31-33). These computational approaches represent a validated  
105 methodology for rapidly identifying potential T cell and B cell epitopes for exploratory peptide-based  
106 vaccine development and have been recently used to identify target epitopes for MERS-CoV (34) and  
107 SARS-CoV-2, although many of these reports focus solely on structural proteins (35-38).

108 Herein, we employed a comprehensive immunoinformatics approach to identify putative T cell  
109 and B cell epitopes across the entire SARS-CoV-2 proteome (**Figure 1C**). We independently identified  
110 peptides from each viral protein that were restricted to either HLA class I or HLA class II molecules  
111 across a subset of the most common HLA alleles in the global population. By filtering this list of peptides  
112 on the basis of predicted binding affinity, antigenicity, and promiscuity, we produced 5 HLA class I-  
113 restricted and 36 HLA class II-restricted peptides as leading candidates for further study. We also  
114 evaluated linear and structural B cell epitopes in the SARS-CoV-2 spike protein, with six antigenic  
115 regions identified as potential sites for antibody binding. These selected peptides may serve as initial  
116 candidates in the rational and accelerated design of a peptide-based vaccine against SARS-CoV-2.

## 117 **Methods**

### 118 *Comparison of genome sequences from SARS-CoV-2 isolates*

119 Genomic sequences for reported SARS-CoV-2 isolates were identified and retrieved from the  
120 Virus Pathogen Resource (ViPR) database on February 27, 2020  
121 ([https://www.viprbrc.org/brc/home.spg?decorator=corona\\_ncov](https://www.viprbrc.org/brc/home.spg?decorator=corona_ncov)). Sequences that did not cover the  
122 complete viral genome (~29,900 nucleotides) were excluded from further analysis. Remaining sequences  
123 were aligned using the Clustal Omega program (version 1.2.4) from the European Bioinformatics Institute  
124 (39) and compared against the first reported genome sequence for SARS-CoV-2 (Wuhan-Hu-1; taxonomy

125 ID: 2697049) (1). Sequences from Wuhan-Hu-1 viral proteins were determined to be representative of  
126 those from all viral isolates and were subsequently used for epitope prediction analyses.

### 127 *Prediction of SARS-CoV-2 T cell epitopes*

128 Prediction of HLA class I and class II peptide epitopes was carried out with the 10 protein  
129 sequences reported for the Wuhan-Hu-1 isolate: E (GenBank accession: QHD43418), M (QHD43419), N  
130 (QHD43423), S (QHD43416), ORF3a (QHD43417), ORF6 (QHD43420), ORF7a (QHD43421), ORF8  
131 (QHD43422), ORF10 (QHI42199), ORF1ab (QHD43415).

132 For CD8<sup>+</sup> T cell epitope prediction, NetCTL 1.2 (Immune Epitope Database) was initially used to  
133 evaluate the binding of nonameric peptides derived from each viral protein to the most common HLA  
134 class I supertypes present among the human population (40, 41). HLA class I molecules preferentially  
135 bind 9-mer peptides, and most algorithm training datasets have been based on peptides of this length. The  
136 weight placed on C-terminal cleavage and antigen transport efficiency was 0.15 and 0.05, respectively.  
137 The antigenic score threshold was 0.75. Peptides with scores above this threshold were subsequently  
138 analyzed on the NetMHCpan 4.0 server (Technical University of Denmark) to predict binding affinity and  
139 percentile rank across representative alleles of each major HLA class I supertype (HLA-A\*01:01, HLA-  
140 A\*02:01, HLA-A\*03:01, HLA-A\*24:02, HLA-B\*07:02, HLA-B\*08:01, HLA-B\*27:05, HLA-B\*40:01,  
141 HLA-B\*58:01, HLA-B\*15:01), which collectively cover the majority of class I alleles present in the  
142 human population (42-44). Thresholds for defining binding strength were set at 0.5% and 2.0% for strong  
143 and weak binders, respectively.

144 For CD4<sup>+</sup> T cell epitope prediction, NetMHCIIpan 3.2 server (Technical University of Denmark)  
145 was used for predicting the binding affinity and percentile rank of 15-mer peptides derived from each  
146 viral protein across a reference panel of 27 HLA class II molecules (33, 45). Thresholds for defining  
147 binding strength were set at 2% and 10% for strong and weak binders, respectively.

148 HLA class I and class II peptides with high predicted binding affinities ( $\leq 500$  nM), high  
149 percentile ranks ( $\leq 0.5\%$  for class I;  $\leq 2\%$  for class II), and broad HLA coverage ( $\geq 3$  alleles) were  
150 independently analyzed on the VaxiJen 2.0 server (Edward Jenner Institute) (46, 47) using a conservative  
151 score threshold (0.7) to predict antigenicity.

### 152 *Molecular docking of HLA class I peptides*

153 Docking simulations of 5 HLA class I-restricted SARS-CoV-2 peptides with high antigenicity  
154 scores and a commonly shared predicted HLA molecule (HLA-DRB1\*15:01) were performed using the  
155 GalaxyPepDock server (Seoul National University Laboratory of Computational Biology) (48). The  
156 structure of HLA-DRB1\*15:01 was accessed from the Protein Data Bank as a co-crystallized structure of  
157 the HLA molecule with a nonameric SARS-CoV peptide (PDB ID: 3C9N) (49). The bound nonamer

158 peptide was removed from the structure using Chimera 1.14 (University of California-San Francisco) (50)  
159 prior to running simulations. Ten models of each peptide-HLA complex were generated on the basis of  
160 minimized energy scores, and the top model for each complex was selected for comparative analysis.

### 161 *Prediction and structural modeling of SARS-CoV-2 B cell epitopes*

162 Linear B cell epitope predictions were performed on the three exposed SARS-CoV-2 structural  
163 proteins: S (GenBank accession: QHD43416), M (QHD43419), and E (QHD43418) using the BepiPred  
164 1.0 algorithm (51). Epitope probability scores were calculated for each amino acid residue using a  
165 threshold of 0.35 (corresponding to > 0.75 specificity and sensitivity below 0.5), and only epitopes  $\geq 5$   
166 amino acid residues in length were further analyzed. The structure of the SARS-CoV-2 S protein was  
167 accessed from the Protein Data Bank (PDB ID: 6VSB) (52). Discontinuous (i.e., structural) B cell epitope  
168 predictions for the S protein structure were carried out using DiscoTope 1.1 (53) with a score threshold  
169 greater than  $-7.7$  (corresponding to > 0.75 specificity and sensitivity below 0.5). The main protein  
170 structure was modeled in PyMOL (Schrödinger, LLC), with predicted B cell epitopes identified by both  
171 BepiPred 1.0 and DiscoTope 1.1 highlighted as spheres.

## 172 **Results**

### 173 *Genetic similarity of SARS-CoV-2 isolates*

174 The primary goal of our study was to identify peptide epitopes that would be broadly applicable  
175 in vaccine development efforts against SARS-CoV-2. We identified 64 point mutations and 4 deletions  
176 across the genomes of 44 clinical isolates, with all deletions and the majority of mutations (n=45)  
177 occurring in the ORF1ab polyprotein (**Supp. Figure S1**). Single-point mutations were also found in the S  
178 protein (n=5), N protein (n=5), ORF8 protein (n=3), ORF3a protein (n=2), ORF10 protein (n=2), E  
179 protein (n=1), and M protein (n=1). Despite the genetic diversity introduced by these events (**Figure 1D**),  
180 matrix analysis determined that > 99% sequence identity was maintained across all viral genomes. Based  
181 on these findings and for study feasibility, the genome from the original virus isolate (Wuhan-Hu-1;  
182 GenBank: MN908947) was selected as the consensus sequence for all further analyses.

### 183 *Prediction of CD8<sup>+</sup> T cell epitopes in the SARS-CoV-2 proteome*

184 We next identified potential CD8<sup>+</sup> T cell epitopes from all proteins in the SARS-CoV-2  
185 proteome. Using the NetCTL 1.2 predictive algorithm, we analyzed the complete amino acid sequence of  
186 each viral protein to generate sets of 9-mer peptides predicted to be recognized across at least one of the  
187 major HLA class I supertypes (**Figure 2A, Supp. Figure S2**). This approach yielded a significant number  
188 of potential epitopes from each viral protein (ORF10: 9, ORF6: 17, ORF8: 23, E: 25, ORF7: 39, N: 80,  
189 M: 87, ORF3a: 87, S: 321, ORF1ab: 2814), with the number directly related to the size of the parent

190 protein. We used the NetMHCpan 4.0 server to further refine the list of potential CD8<sup>+</sup> T cell epitopes by  
191 predicting binding affinity across representative HLA class I alleles (see Methods) and assigning  
192 percentile scores to quantify binding propensity. Peptides with percentile rank scores  $\leq 0.5\%$  (i.e., strong  
193 binders) were filtered using a 500 nM threshold for binding affinity to further delineate 740 candidate  
194 HLA class I epitopes from the viral proteome (54). For feasibility reasons, we refined our selection to 83  
195 candidate epitopes by excluding peptides predicted to bind only one HLA molecule (**Supp. Table S1**).  
196 The resultant peptides were enriched for predicted binders to HLA-B molecules (HLA-B\*15:01=50;  
197 HLA-B\*58:01=32; HLA-B\*08:01=31) (**Figure 2B**). A final round of selection on the basis of HLA  
198 promiscuity (i.e., predicted binding to  $\geq 3$  HLA molecules) and predicted antigenicity scoring using the  
199 VaxiJen 2.0 server produced a subset of five candidate peptides (four ORF1ab, one S protein) as potential  
200 targets for vaccine development (**Table 1**) with the hypothesis that increased HLA binding promiscuity  
201 meant broader population base coverage by those peptides. These peptides were predicted to provide 74%  
202 global population coverage and had higher predicted binding affinities for HLA-B molecules  
203 (B\*08:01=42.6 nM; B\*15:01=67.7 nM; B\*58:01=110.3 nM) compared to HLA-A molecules  
204 (A\*01:01=238.6 nM; A\*24:02=142.9 nM), with the exception of one ORF1ab-derived peptide  
205 (MMISAGFSL) that was predicted to bind HLA-A\*02:01 with high affinity ( $IC_{50}$ = 6.9 nM) (**Figure 2C**).

#### 206 *Prediction of CD4<sup>+</sup> T cell epitopes in the SARS-CoV-2 proteome*

207 We also sought to identify potential HLA class II peptides from SARS-CoV-2, as the stimulation  
208 of CD4<sup>+</sup> T-helper cells is critical for robust vaccine-induced adaptive immune responses. Using the  
209 NetMHCIIpan 3.2 server, we identified 801 candidate HLA class II peptides from the viral proteome  
210 predicted to have high binding affinity ( $\leq 500$  nM) and percentile rank scores  $\leq 2\%$  across a reference  
211 panel of HLA molecules covering  $> 97\%$  of the population (33, 45). Similar to HLA class I epitope  
212 predictions, the number of class II epitopes identified for each viral protein (ORF10: 4, E protein: 7,  
213 ORF7: 8, ORF8: 10, ORF6: 14, N: 15, M: 29, ORF3a: 31, S: 96, ORF1ab: 587) was largely proportional  
214 to protein size. After excluding peptides predicted to bind to only a single HLA molecule in our panel, we  
215 refined our selection to 211 peptides (**Supp. Table S2**), which were enriched for binding to HLA-DRB1  
216 molecules (n=142) (**Figure 2D**). Filtering on HLA promiscuity and predicted antigenicity scores yielded  
217 a subset of 36 peptides (24 ORF1ab, 5 S protein, 2 M protein, 2 ORF7, 1 ORF3a, 1 ORF6, 1 ORF8) as  
218 CD4<sup>+</sup> T cell epitopes for further study (**Table 1**). These peptides were predicted to collectively provide  
219 99% population coverage and have significantly higher average binding affinities for HLA-DR alleles  
220 (DRB1=56.4 nM; DRB3=50.9 nM; DRB4=70.1 nM; DRB5=18 nM) compared to HLA-DP (155.9 nM)  
221 or HLA-DQ (238.6 nM) molecules (**Figure 2E**).

#### 222 *Characterization of HLA class I peptide docking with HLA-B\*15:01*



223 The five candidate HLA class I peptides identified by our computational approach were predicted  
224 to provide coverage across six HLA alleles (A\*01:01, A\*02:01, A\*24:02, B\*08:01, B\*15:01, B\*58:01).  
225 The peptide FAMQMAYRF was the only candidate predicted to bind to A\*24:02 molecules, whereas  
226 MMISAGFSL was predicted to uniquely bind A\*02:01 and B\*08:01 molecules. Four of the five peptides  
227 were predicted to bind A\*01:01 and B\*58:01 molecules, but all were predicted to bind with relatively  
228 high affinity (average  $IC_{50} = 67.7$  nM) to HLA-B\*15:01. Therefore, we performed molecular docking  
229 studies of each peptide with the molecular structure of HLA-B\*15:01 (PDB: 3C9N).

230 All peptides were predicted to bind within the peptide binding groove, forming hydrogen bond  
231 contacts with numerous amino acid side chains (**Figure 3A**). The binding motif for HLA-B\*15:01 is  
232 highly selective for residues at the P2 and P9 anchor positions, with a preference for bulky hydrophobic  
233 amino acids at the C-terminus (**Figure 3B**) (55). All candidate peptides possessed terminal residues (Phe,  
234 Tyr, Leu) that fit into the hydrophobic binding pocket of the HLA groove, further supporting that these  
235 peptides should be strong binders of HLA-B\*15:01 and promising candidates for vaccine development  
236 studies.

#### 237 *Prediction of B cell epitopes in SARS-CoV-2 proteins*

238 An effective vaccine should stimulate both cellular and humoral immune responses against the  
239 target pathogen; therefore, we also sought to identify potential B cell epitopes from SARS-CoV-2  
240 proteins. We limited our analysis to the primary structural proteins exposed on the virus capsid (S, N, M,  
241 and E), as these are the most accessible antigens for engaging B cell receptors. Using the Bepipred 1.0  
242 algorithm, we identified 26 potential linear B cell epitopes in the S protein, 14 potential epitopes in the N  
243 protein, and 3 potential epitopes in the M protein (**Table 2**). No epitopes were identified in the E protein.  
244 Studies have previously shown the S protein to be the predominant target of neutralizing antibodies  
245 against coronaviruses (56, 57), and, as our findings indicate this to likely be the case for SARS-CoV-2,  
246 we focused all subsequent analyses on the S protein. While the N protein is also a major target of the  
247 antibody response (58), it is unlikely these antibodies have any neutralizing activity based on the viral  
248 structure. As epitope conformation can significantly influence recognition by antibodies, we also  
249 employed DiscoTope 1.1 to identify discontinuous B cell epitopes in the protein structure. Our analysis  
250 identified 14 potential structural epitopes in the S protein (7 in the S1 domain, 7 in the S2 domain), with  
251 six regions having significant overlap with our predicted linear epitopes (**Table 2**). Antigenic regions  
252 identified in both analyses were modeled using the recently published structure of the SARS-CoV-2 S  
253 protein (52) to examine their accessibility for antibody binding. Epitopes in the S2 domain (P792-D796;  
254 Y1138-D1146) were clustered near the base of the spike protein, whereas regions in the S1 domain  
255 (D405-D428; N440-N450; G496-P507; D568-T573) were exposed on the protein surface (**Figure 4**).



## 256 Discussion

257 In the face of the COVID-19 pandemic, it is imperative that safe and effective vaccines be rapidly  
258 developed in order to induce widespread herd immunity in the population and prevent the continued  
259 spread of SARS-CoV-2. Our study identified probable peptide targets of both cellular and humoral  
260 immune responses against SARS-CoV-2 using computational methodologies to investigate the entire viral  
261 proteome *a priori*. Studies such as these are paramount during the early stages of pandemic vaccine  
262 development given the relative scarcity of biological data available on the viral immune response, and we  
263 employed an approach that allowed us to systematically refine our predictions using increasingly stringent  
264 criteria to select a subset of the most promising epitopes for further study. The data we have curated could  
265 inform the design of a candidate peptide-based vaccine or diagnostic against SARS-CoV-2.

266 As selective pressures are known to introduce viral mutations that promote fitness and can lead  
267 to evasion of immune responses (59, 60), we first sought to investigate the genetic similarity of all  
268 reported SARS-CoV-2 clinical isolates and identify a consensus sequence for use in our epitope  
269 prediction studies. We identified 68 mutations/deletions across the 44 genomes of clinical isolates  
270 reported as of 27 February 2020. Despite these variations, the viral genomic identity was > 99%  
271 conserved across all isolates. As the protein coding sequences were largely conserved, the genome of the  
272 original virus isolate (Wuhan-Hu-1) was deemed a representative consensus sequence for analysis of the  
273 SARS-CoV-2 proteome.

274 CD4<sup>+</sup> and CD8<sup>+</sup> T cell responses will likely be directed against both structural and non-structural  
275 proteins during antiviral immune responses, as all viral proteins are accessible for processing and  
276 presentation on the HLA molecules of infected cells. Therefore, we sought to identify T cell epitopes  
277 across the entire viral proteome. Our analysis identified 83 potential CD8<sup>+</sup> T cell epitopes (**Supp. Table**  
278 **S1**) and 211 potential CD4<sup>+</sup> T cell epitopes (**Supp. Table S2**), with stringent filtering for more  
279 promiscuous peptides with high predicted antigenicity yielding a subset of 5 CD8<sup>+</sup> T cell epitopes and 36  
280 CD4<sup>+</sup> T cell epitopes (**Table 1**) as potential targets for vaccine development. A single study by Grifoni  
281 and colleagues has recently reported the computational identification of 241 CD4<sup>+</sup> T cell epitopes from  
282 SARS-CoV-2 (35), and 22 peptides from our analysis shared sequence homology or were nested within  
283 peptides identified in their study. Moreover, seven peptides from this initial report were replicated in our  
284 final subset of HLA class II epitopes, supporting that these peptides may be promising vaccine targets.

285 An increasing number of studies have employed predictive algorithms to identify potential HLA  
286 class I epitopes for SARS-CoV-2, although relatively few have comprehensively analyzed the entire viral  
287 proteome. A report from Feng *et al.* recently outlined the identification of 499 potential class I epitopes in  
288 the main structural proteins from SARS-CoV-2 but did not consider any non-structural proteins (38).  
289 Grifoni and colleagues conducted a more rigorous analysis, identifying 628 unique CD8<sup>+</sup> T cell epitopes

290 across all SARS-CoV-2 proteins but focusing their analyses solely on peptides with sequence homology  
291 to known SARS-CoV epitopes (35). Our approach initially identified ~ 3,500 potential CD8<sup>+</sup> T cell  
292 epitopes across all viral proteins, which we refined to a subset of 5 peptides (**Table 1**). One peptide  
293 derived from ORF1ab (MMISAGFSL) was predicted to bind HLA-A\*02:01 with high affinity ( $IC_{50}$ = 6.9  
294 nM) (**Figure 2C**). Given the prevalence of this allele in the American and European populations (25-60%  
295 frequency) (61), MMISAGFSL may represent a promising epitope capable of providing broad vaccine  
296 population coverage.

297 We also observed a notable enrichment of epitopes predicted to bind HLA-B molecules—  
298 particularly HLA-B\*15:01—as we imposed more stringent selection criteria (**Figure 2B**). All five peptides  
299 identified by our approach were predicted to be relatively strong binders for this allele ( $IC_{50}$  = 67.7 nM),  
300 with molecular docking simulations illustrating strong contacts with amino acid residues in the peptide  
301 binding groove (**Figure 3 A, B**). A recent computational study identified another HLA-B allele (B\*15:03)  
302 as having a high capacity for presenting epitopes from SARS-CoV-2 that were conserved among other  
303 pathogenic coronaviruses (62). These data collectively suggest the HLA-B locus may be significantly  
304 associated with the immune response to SARS-CoV-2 (and potentially other coronaviruses), with further  
305 biological studies warranted to determine the true role of host genetics in SARS-CoV-2 immunology.

306 Lastly, we analyzed the primary structural proteins of SARS-CoV-2 (S, N, M, E proteins) for  
307 potential B cell epitopes, as an ideal vaccine would be designed to stimulate both cellular and humoral  
308 immunity. Our analysis identified potential linear B cell epitopes in all proteins except for the E protein  
309 (**Table 2**). The greatest number of epitopes were predicted in the surface-exposed S protein (n=26), but a  
310 significant number of epitopes were also predicted for the N protein (n=14). This is not surprising, as  
311 previous reports identified the N protein as a significant target of the humoral response to SARS-CoV  
312 (63, 64). As the S protein is the predominant surface protein and has been the primary target of  
313 neutralizing antibody responses against other coronaviruses (56, 57), we elected to focus our subsequent  
314 analyses solely on antigenic regions in the S protein. We identified 14 potential structural epitopes in the  
315 S protein structure and referenced against our linear epitope predictions to identify six regions that were  
316 independently identified by both analyses (**Table 2, Figure 4**). Feng *et al.* recently reported the  
317 computational identification of 19 surface epitopes in the S protein using Bepipred and the Kolaskar  
318 method (38), four of which had significant sequence overlap with the regions identified by our analyses.

319 To further evaluate the potential of these six antigenic regions as targets for antibody binding, we  
320 modeled their surface accessibility on the crystal structure of the SARS-Cov-2 spike protein (52). Four  
321 regions in the S1 domain (D405-D428; N440-N450; G496-P507; D568-T573) were solvent exposed  
322 (**Figure 4 A, B**), with minimal steric hindrance for antibody accessibility. The S1 domain contains the  
323 residues (N331-V524) important for virus binding to angiotensin converting enzyme 2 (ACE2) on the cell

324 surface (65), and studies have shown that antibodies with potent neutralizing activity against SARS-CoV  
325 target this domain (66-68). Indeed, three of the four S1 epitopes identified in our analyses are located in  
326 the ACE2-binding region, supporting their potential utility in vaccine development against SARS-CoV-2.  
327 Two regions were identified in the S2 “stalk” domain of the S protein (**Figure 4 A, C**). While Y1138-  
328 D1146 is located at the base of the S protein and likely inaccessible to antibodies, P792-D796 is on the  
329 outer face of the protein and has been previously identified as part of a larger B cell epitope that is  
330 conserved with SARS-CoV (35). As SARS-CoV S2-specific antibodies have previously been shown to  
331 possess antiviral activity (66), it is interesting to speculate whether a strategy similar to targeting the  
332 influenza hemagglutinin protein stalk could be employed for developing a broadly reactive coronavirus  
333 vaccine.

334 Our study possessed several strengths and limitations. Rather than restricting our analyses of  
335 HLA class I and class II epitopes to specific proteins based on prior studies of SARS-CoV immunology,  
336 we investigated the complete proteome of SARS-CoV-2 using an unbiased approach. Furthermore, we  
337 employed a multi-tiered strategy for identifying putative B cell and T cell epitopes from all viral proteins  
338 studied. Our initial analyses were performed with liberal thresholds for epitope identification, and at each  
339 additional step, we imposed more stringent selection criteria to filter these peptides to a subset of B cell  
340 and T cell epitopes for further study. Nevertheless, the results of this study are derived purely from  
341 computational methods, and it should be noted that computational algorithms can fail to capture a  
342 significant number of antigenic peptides (69). Experimental validation with biological samples will  
343 ultimately be needed.

344 During the early stages of a pandemic, access to sufficient biological samples may be extremely  
345 limited, so we must continue to utilize methodologies—such as computational predictive algorithms—  
346 that allow us to explore the epitope landscape for experimental vaccine development. Our approach in this  
347 study allowed us to identify and refine a manageable subset of T cell and B cell epitopes for further  
348 testing as components of a SARS-CoV-2 vaccine. Based on our results, our proposed SARS-CoV-2  
349 vaccine formulation could contain the following: 1) one or more B cell peptide epitopes from the S  
350 protein to generate protective neutralizing antibodies; and 2) multiple HLA class I and class II-derived  
351 peptides from other viral proteins to stimulate robust CD8<sup>+</sup> and CD4<sup>+</sup>T cell responses. Based on global  
352 allele frequencies, these class I and class II peptides would be expected to collectively provide 74% and  
353 99% population coverage, respectively. While such a vaccine could be readily formulated as a synthetic  
354 polypeptide or an adjuvanted peptide mixture, these strategies may not retain the epitope structural  
355 features necessary to induce a robust antibody response. Recombinant nanoparticles and assembly into  
356 VLPs represent promising alternative vaccine platforms, as they have been extensively used for the  
357 controlled display and delivery of peptide-based vaccine components (70-73). By omitting whole viral

358 proteins from the vaccine formulation, a peptide-based SARS-CoV-2 vaccine should have a well-  
359 tolerated safety profile and avoid the adverse events previously observed with experimental SARS-CoV  
360 vaccines (19-22).

361 In summary, we have identified 41 potential T cell epitopes (5 HLA class I, 36 HLA class II) and  
362 6 potential B cell epitopes from across the SARS-CoV-2 proteome that are predicted to have broad  
363 population coverage and could serve as the basis for designing investigational peptide-based vaccines.  
364 Further study on the biological relevance and immunogenicity of these peptides is warranted in an effort  
365 to develop a safe and effective vaccine to combat the SARS-CoV-2 pandemic.

### 366 **Acknowledgments**

367 The authors would like to thank Caroline L. Vitse for editorial assistance with this manuscript.  
368 The research presented here was not supported by any specific funding source.

### 369 **Conflicts of Interest**

370 Dr. Poland is the chair of a Safety Evaluation Committee for novel investigational vaccine trials  
371 being conducted by Merck Research Laboratories. Dr. Poland offers consultative advice on vaccine  
372 development to Merck & Co. Inc., Avianax, Adjuvance, Valneva, Medicago, Sanofi Pasteur,  
373 GlaxoSmithKline, and Emergent Biosolutions. Drs. Poland and Ovsyannikova hold three patents related  
374 to measles and vaccinia peptide research. Dr. Kennedy holds a patent on vaccinia peptide research. Dr.  
375 Kennedy has received funding from Merck Research Laboratories to study waning immunity to measles  
376 and mumps after immunization with the MMR-II<sup>®</sup> vaccine. All other authors declare no competing  
377 financial interests. This research has been reviewed by the Mayo Clinic Conflict of Interest Review Board  
378 and was conducted in compliance with Mayo Clinic Conflict of Interest policies.

379

380

381

382

383

384

385

386

387

388  
389  
390  
391  
392  
393  
394  
395  
396  
397  
398  
399  
400  
401  
402  
403  
404  
405  
406  
407  
408  
409  
410  
411  
412  
413  
414  
415  
416  
417  
418  
419  
420  
421  
422  
423  
424  
425  
426  
427  
428  
429  
430  
431  
432  
433  
434  
435  
436

## References

1. Wu F, *et al.* (2020) A new coronavirus associated with human respiratory disease in China. *Nature* 579(7798):265-269.
2. Chan JF, *et al.* (2020) A familial cluster of pneumonia associated with the 2019 novel coronavirus indicating person-to-person transmission: a study of a family cluster. *Lancet* 395(10223):514-523.
3. Cucinotta D & Vanelli M (2020) WHO Declares COVID-19 a Pandemic. *Acta Biomed* 91(1):157-160.
4. Chen N, *et al.* (2020) Epidemiological and clinical characteristics of 99 cases of 2019 novel coronavirus pneumonia in Wuhan, China: a descriptive study. *Lancet* 395(10223):507-513.
5. Wang D, *et al.* (2020) Clinical Characteristics of 138 Hospitalized Patients With 2019 Novel Coronavirus-Infected Pneumonia in Wuhan, China. *JAMA*. [ePub ahead of print] doi: 10.1001/jama.2020.1585
6. Huang C, *et al.* (2020) Clinical features of patients infected with 2019 novel coronavirus in Wuhan, China. *Lancet* 395(10223):497-506.
7. World Health Organization. (2020) Coronavirus disease (COVID-19) Situation Report - 113. [https://www.who.int/docs/default-source/coronaviruse/situation-reports/20200512-covid-19-sitrep-113.pdf?sfvrsn=feac3b6d\\_2](https://www.who.int/docs/default-source/coronaviruse/situation-reports/20200512-covid-19-sitrep-113.pdf?sfvrsn=feac3b6d_2). May 12, 2020.
8. Drosten C, *et al.* (2003) Identification of a novel coronavirus in patients with severe acute respiratory syndrome. *N Engl J Med* 348(20):1967-1976.
9. Ksiazek TG, *et al.* (2003) A novel coronavirus associated with severe acute respiratory syndrome. *N Engl J Med* 348(20):1953-1966.
10. Zaki AM, van Boheemen S, Bestebroer TM, Osterhaus AD, & Fouchier RA (2012) Isolation of a novel coronavirus from a man with pneumonia in Saudi Arabia. *N Engl J Med* 367(19):1814-1820.
11. Li W, *et al.* (2005) Bats are natural reservoirs of SARS-like coronaviruses. *Science* 310(5748):676-679.
12. Zhou P, *et al.* (2020) A pneumonia outbreak associated with a new coronavirus of probable bat origin. *Nature* 579(7798):270-273.
13. Memish ZA, *et al.* (2013) Middle East respiratory syndrome coronavirus in bats, Saudi Arabia. *Emerg Infect Dis* 19(11):1819-1823.
14. Haagmans BL, *et al.* (2014) Middle East respiratory syndrome coronavirus in dromedary camels: an outbreak investigation. *Lancet Infect Dis* 14(2):140-145.
15. Walls AC, *et al.* (2020) Structure, Function, and Antigenicity of the SARS-CoV-2 Spike Glycoprotein. *Cell* 181(2):281-292.
16. Weston S & Frieman MB (2020) COVID-19: Knowns, Unknowns, and Questions. *mSphere* 5(2).
17. World Health Organization (2020) Draft landscape of COVID-19 candidate vaccines. <https://www.who.int/who-documents-detail/draft-landscape-of-covid-19-candidate-vaccines>. May 5, 2020.
18. Poland GA (2020) Tortoises, hares, and vaccines: A cautionary note for SARS-CoV-2 vaccine development. *Vaccine* [ePub ahead of print]. doi: 10.1016/j.vaccine.2020.04.073
19. Tseng CT, *et al.* (2012) Immunization with SARS coronavirus vaccines leads to pulmonary immunopathology on challenge with the SARS virus. *PLoS One* 7(4):e35421.
20. Deming D, *et al.* (2006) Vaccine efficacy in senescent mice challenged with recombinant SARS-CoV bearing epidemic and zoonotic spike variants. *PLoS Med* 3(12):e525.
21. Yasui F, *et al.* (2008) Prior immunization with severe acute respiratory syndrome (SARS)-associated coronavirus (SARS-CoV) nucleocapsid protein causes severe pneumonia in mice infected with SARS-CoV. *J Immunol* 181(9):6337-6348.



- 437 22. Bolles M, *et al.* (2011) A double-inactivated severe acute respiratory syndrome coronavirus  
438 vaccine provides incomplete protection in mice and induces increased eosinophilic  
439 proinflammatory pulmonary response upon challenge. *J Virol* 85(23):12201-12215.
- 440 23. Weingartl H, *et al.* (2004) Immunization with modified vaccinia virus Ankara-based recombinant  
441 vaccine against severe acute respiratory syndrome is associated with enhanced hepatitis in ferrets.  
442 *J Virol* 78(22):12672-12676.
- 443 24. Lu R, *et al.* (2020) Genomic characterisation and epidemiology of 2019 novel coronavirus:  
444 implications for virus origins and receptor binding. *Lancet* 395(10224):565-574.
- 445 25. Channappanavar R, Fett C, Zhao J, Meyerholz DK, & Perlman S (2014) Virus-specific memory  
446 CD8 T cells provide substantial protection from lethal severe acute respiratory syndrome  
447 coronavirus infection. *J Virol* 88(19):11034-11044.
- 448 26. Ng OW, *et al.* (2016) Memory T cell responses targeting the SARS coronavirus persist up to 11  
449 years post-infection. *Vaccine* 34(17):2008-2014.
- 450 27. Zhao J, *et al.* (2016) Airway Memory CD4(+) T Cells Mediate Protective Immunity against  
451 Emerging Respiratory Coronaviruses. *Immunity* 44(6):1379-1391.
- 452 28. Lorente E, *et al.* (2016) Structural and Nonstructural Viral Proteins Are Targets of T-Helper  
453 Immune Response against Human Respiratory Syncytial Virus. *Mol Cell Proteomics* 15(6):2141-  
454 2151.
- 455 29. Ip PP, *et al.* (2014) Alphavirus-based vaccines encoding nonstructural proteins of hepatitis C  
456 virus induce robust and protective T-cell responses. *Mol Ther* 22(4):881-890.
- 457 30. Henriques HR, *et al.* (2013) Targeting the non-structural protein 1 from dengue virus to a  
458 dendritic cell population confers protective immunity to lethal virus challenge. *PLoS Negl Trop*  
459 *Dis* 7(7):e2330.
- 460 31. Tomar N & De RK (2014) Immunoinformatics: a brief review. *Methods Mol Biol* 1184:23-55.
- 461 32. Backert L & Kohlbacher O (2015) Immunoinformatics and epitope prediction in the age of  
462 genomic medicine. *Genome Med* 7:119.
- 463 33. Jensen KK, *et al.* (2018) Improved methods for predicting peptide binding affinity to MHC class  
464 II molecules. *Immunology* 154(3):394-406.
- 465 34. Tahir Ul Qamar M, *et al.* (2019) Epitope-based peptide vaccine design and target site depiction  
466 against Middle East Respiratory Syndrome Coronavirus: an immune-informatics study. *J Transl*  
467 *Med* 17(1):362.
- 468 35. Grifoni A, *et al.* (2020) A Sequence Homology and Bioinformatic Approach Can Predict  
469 Candidate Targets for Immune Responses to SARS-CoV-2. *Cell Host Microbe* 27(4):671-680  
470 e672.
- 471 36. Fast E, Altman RB, & Chen B (2020) Potential T-cell and B-cell Epitopes of 2019-nCoV.  
472 *bioRxiv*:2020.2002.2019.955484.
- 473 37. Seema M (2020) T Cell Epitope-Based Vaccine Design for Pandemic Novel Coronavirus 2019-  
474 nCoV. doi: 10.26434/chemrxiv.12029523.v1 (April 3, 2020)
- 475 38. Feng Y, *et al.* (2020) Multi-epitope vaccine design using an immunoinformatics approach for  
476 2019 novel coronavirus in China (SARS-CoV-2). *bioRxiv*:2020.2003.2003.962332.
- 477 39. Madeira F, *et al.* (2019) The EMBL-EBI search and sequence analysis tools APIs in 2019.  
478 *Nucleic Acids Res* 47(W1):W636-W641.
- 479 40. Larsen MV, *et al.* (2007) Large-scale validation of methods for cytotoxic T-lymphocyte epitope  
480 prediction. *BMC Bioinformatics* 8:424.
- 481 41. Larsen MV, *et al.* (2005) An integrative approach to CTL epitope prediction: a combined  
482 algorithm integrating MHC class I binding, TAP transport efficiency, and proteasomal cleavage  
483 predictions. *Eur J Immunol* 35(8):2295-2303.
- 484 42. Hoof I, *et al.* (2009) NetMHCpan, a method for MHC class I binding prediction beyond humans.  
485 *Immunogenetics* 61(1):1-13.
- 486 43. Jurtz V, *et al.* (2017) NetMHCpan-4.0: Improved Peptide-MHC Class I Interaction Predictions  
487 Integrating Eluted Ligand and Peptide Binding Affinity Data. *J Immunol* 199(9):3360-3368.



- 488 44. Nielsen M & Andreatta M (2016) NetMHCpan-3.0; improved prediction of binding to MHC class  
489 I molecules integrating information from multiple receptor and peptide length datasets. *Genome*  
490 *Med* 8(1):33.
- 491 45. Greenbaum J, *et al.* (2011) Functional classification of class II human leukocyte antigen (HLA)  
492 molecules reveals seven different supertypes and a surprising degree of repertoire sharing across  
493 supertypes. *Immunogenetics* 63(6):325-335.
- 494 46. Doytchinova IA & Flower DR (2007) VaxiJen: a server for prediction of protective antigens,  
495 tumour antigens and subunit vaccines. *BMC Bioinformatics* 8:4.
- 496 47. Doytchinova IA & Flower DR (2007) Identifying candidate subunit vaccines using an alignment-  
497 independent method based on principal amino acid properties. *Vaccine* 25(5):856-866.
- 498 48. Ko J, Park H, Heo L, & Seok C (2012) GalaxyWEB server for protein structure prediction and  
499 refinement. *Nucleic Acids Res* 40(Web Server issue):W294-297.
- 500 49. Roder G, Kristensen O, Kastrup JS, Buus S, & Gajhede M (2008) Structure of a SARS  
501 coronavirus-derived peptide bound to the human major histocompatibility complex class I  
502 molecule HLA-B\*1501. *Acta Crystallogr Sect F Struct Biol Cryst Commun* 64(Pt 6):459-462.
- 503 50. Pettersen EF, *et al.* (2004) UCSF Chimera--a visualization system for exploratory research and  
504 analysis. *J Comput Chem* 25(13):1605-1612.
- 505 51. Larsen JE, Lund O, & Nielsen M (2006) Improved method for predicting linear B-cell epitopes.  
506 *Immunome Res* 2:2.
- 507 52. Wrapp D, *et al.* (2020) Cryo-EM structure of the 2019-nCoV spike in the prefusion conformation.  
508 *Science* 367(6483):1260-1263.
- 509 53. Haste Andersen P, Nielsen M, & Lund O (2006) Prediction of residues in discontinuous B-cell  
510 epitopes using protein 3D structures. *Protein Sci* 15(11):2558-2567.
- 511 54. Sette A, *et al.* (1994) The relationship between class I binding affinity and immunogenicity of  
512 potential cytotoxic T cell epitopes. *Journal of Immunology* 153:5586-5592.
- 513 55. Roder G, *et al.* (2006) Crystal structures of two peptide-HLA-B\*1501 complexes; structural  
514 characterization of the HLA-B62 supertype. *Acta Crystallogr D Biol Crystallogr* 62(Pt 11):1300-  
515 1310.
- 516 56. Okba NMA, *et al.* (2020) SARS-CoV-2 specific antibody responses in COVID-19 patients.  
517 *medRxiv*:2020.2003.2018.20038059.
- 518 57. Wang Q, *et al.* (2016) Immunodominant SARS Coronavirus Epitopes in Humans Elicited both  
519 Enhancing and Neutralizing Effects on Infection in Non-human Primates. *ACS Infect Dis*  
520 2(5):361-376.
- 521 58. Zhang L, *et al.* (2020) Anti-SARS-CoV-2 virus antibody levels in convalescent plasma of six  
522 donors who have recovered from COVID-19. *Aging (Albany NY)* 12(8):6536-6542.
- 523 59. Doud MB, Hensley SE, & Bloom JD (2017) Complete mapping of viral escape from neutralizing  
524 antibodies. *PLoS Pathog* 13(3):e1006271.
- 525 60. Keck ML, Wrensch F, Pierce BG, Baumert TF, & Fong SKH (2018) Mapping Determinants of  
526 Virus Neutralization and Viral Escape for Rational Design of a Hepatitis C Virus Vaccine. *Front*  
527 *Immunol* 9:1194.
- 528 61. Ellis JM, *et al.* (2000) Frequencies of HLA-A2 alleles in five U.S. population groups.  
529 Predominance of A\*02011 and identification of HLA-A\*0231. *Human Immunology* 61(3):334-  
530 340.
- 531 62. Nguyen A, *et al.* (2020) Human leukocyte antigen susceptibility map for SARS-CoV-2.  
532 *medRxiv*:2020.2003.2022.20040600.
- 533 63. Huang LR, *et al.* (2004) Evaluation of antibody responses against SARS coronaviral nucleocapsid  
534 or spike proteins by immunoblotting or ELISA. *J Med Virol* 73(3):338-346.
- 535 64. Qiu M, *et al.* (2005) Antibody responses to individual proteins of SARS coronavirus and their  
536 neutralization activities. *Microbes Infect* 7(5-6):882-889.

- 537 65. Tai W, *et al.* (2020) Characterization of the receptor-binding domain (RBD) of 2019 novel  
538 coronavirus: implication for development of RBD protein as a viral attachment inhibitor and  
539 vaccine. *Cell Mol Immunol.* [ePub ahead of print] doi: 10.1038/s41423-020-0400-4.
- 540 66. Zeng F, *et al.* (2006) Quantitative comparison of the efficiency of antibodies against S1 and S2  
541 subunit of SARS coronavirus spike protein in virus neutralization and blocking of receptor  
542 binding: implications for the functional roles of S2 subunit. *FEBS Lett* 580(24):5612-5620.
- 543 67. Berry JD, *et al.* (2010) Neutralizing epitopes of the SARS-CoV S-protein cluster independent of  
544 repertoire, antigen structure or mAb technology. *MAbs* 2(1):53-66.
- 545 68. He Y, *et al.* (2006) Identification and characterization of novel neutralizing epitopes in the  
546 receptor-binding domain of SARS-CoV spike protein: revealing the critical antigenic  
547 determinants in inactivated SARS-CoV vaccine. *Vaccine* 24(26):5498-5508.
- 548 69. Johnson KL, Ovsyannikova IG, Mason CJ, Bergen HR, III, & Poland GA (2009) Discovery of  
549 naturally processed and HLA-presented class I peptides from vaccinia virus infection using mass  
550 spectrometry for vaccine development. *Vaccine* 28(1):38-47.
- 551 70. Zhang L, *et al.* (2017) Development of Autologous C5 Vaccine Nanoparticles to Reduce  
552 Intravascular Hemolysis in Vivo. *ACS Chem Biol* 12(2):539-547.
- 553 71. Brune KD, *et al.* (2016) Plug-and-Display: decoration of Virus-Like Particles via isopeptide  
554 bonds for modular immunization. *Sci Rep* 6:19234.
- 555 72. Zhai L, *et al.* (2017) A novel candidate HPV vaccine: MS2 phage VLP displaying a tandem HPV  
556 L2 peptide offers similar protection in mice to Gardasil-9. *Antiviral Res* 147:116-123.
- 557 73. McCarthy DP, Hunter ZN, Chackerian B, Shea LD, & Miller SD (2014) Targeted  
558 immunomodulation using antigen-conjugated nanoparticles. *Wiley Interdiscip Rev Nanomed*  
559 *Nanobiotechnol* 6(3):298-315.
- 560 74. Zhang Y & Skolnick J (2004) Scoring function for automated assessment of protein structure  
561 template quality. *Proteins* 57(4):702-710.
- 562 75. Lee H, Heo L, Lee MS, & Seok C (2015) GalaxyPepDock: a protein-peptide docking tool based  
563 on interaction similarity and energy optimization. *Nucleic Acids Res* 43(W1):W431-435.

564

565

566

567

568

569

570

571

572

573

574

575

576 Figure legends

577 Figure 1. (A) Diagram of SARS-CoV-2 virion structure with the major structural proteins (S, M, N, and  
578 E) highlighted. (B) Cartoon representation of the SARS-CoV-2 genome with the 10 major protein-coding  
579 regions annotated. The box diagrams are proportional to the protein size. (C) Diagram of peptide  
580 identification workflow illustrating the algorithms used (33, 40-43, 45-47, 51, 53) and filtering criterion  
581 applied to refine peptide selection. (D) Cladogram illustrating the genetic relationship of SARS-CoV-2  
582 isolates. The original viral isolate and consensus sequence (Wuhan-Hu-1) is highlighted in red.

583

584 Figure 2. Immunogenicity scoring of peptides in the SARS-CoV-2 proteome with predicted HLA class I  
585 and II coverage and binding affinities. (A) Plots illustrating the NetCTL score for each sequential peptide  
586 across the entire amino acid sequence for each SARS-CoV-2 protein. Scores presented are the highest  
587 score identified across all HLA class I supertypes for each peptide. (B) Total number of predicted peptide  
588 epitopes distributed across HLA class I alleles. (C) Average predicted binding affinities by HLA allele for  
589 the top candidate class I peptides listed in Table 1. (D) Total number of predicted peptide epitopes  
590 distributed across HLA class II alleles. (E) Average predicted binding affinities by HLA allele for the top  
591 candidate class II peptides listed in Table 1.

592

593

594 Figure 3. Docking of top predicted HLA class I peptides with a shared HLA molecule. (A) Structural  
595 docking model for each indicated peptide with the molecular structure of HLA-B\*15:01 (PDB: 3C9N).  
596 Individual panels represent top-down views of the peptide binding groove. (B) Binding motif for HLA-  
597 B\*15:01. (C) Template Modeling and Interaction Similarity scores for the selected peptide docking  
598 models shown in panel A. (74, 75)

599

600

601 Figure 4. Modeling of predicted B cell epitopes on the crystal structure of the S glycoprotein. Predicted  
602 structural epitopes in the S1 domain (A) and S2 domain (B) highlighted on the structure of the S  
603 glycoprotein monomer (PDB: 6VSB). (C) Top predicted B cell epitopes identified by both Bepipred and  
604 DiscoTope prediction algorithms highlighted on the trimeric structure of the S glycoprotein. Inset panels  
605 show the S1 domain (upper) and S2 domain (lower). Predicted epitopes are highlighted as colored atoms  
606 (green, blue, red) on the surface of the S protein (salmon).

607

608

609

610

611 Table 1. Top predicted HLA class I and class II T cell epitopes.

| Protein         | Peptide         | Antigenicity Score | Predicted Alleles     | Binding Affinity (nM) |
|-----------------|-----------------|--------------------|-----------------------|-----------------------|
| <i>Class I</i>  |                 |                    |                       |                       |
| S               | FAMQMAYRF       | 1.0278             | A*24:02               | 142.9                 |
|                 |                 |                    | B*15:01               | 123.9                 |
|                 |                 |                    | B*58:01               | 23.4                  |
| ORF1ab          | LSFKELLYY       | 0.7234             | A*01:01               | 371.8                 |
|                 |                 |                    | B*15:01               | 42.6                  |
|                 |                 |                    | B*58:01               | 35.7                  |
| ORF1ab          | MMISAGFSL       | 1.0248             | A*02:01               | 6.9                   |
|                 |                 |                    | B*08:01               | 367.6                 |
|                 |                 |                    | B*15:01               | 16.2                  |
| ORF1ab          | MSNLGMPSY       | 0.9272             | A*01:01               | 184.2                 |
|                 |                 |                    | B*15:01               | 74.1                  |
|                 |                 |                    | B*58:01               | 87.6                  |
| ORF1ab          | STNVTIATY       | 0.7143             | A*01:01               | 241.1                 |
|                 |                 |                    | B*15:01               | 81.9                  |
|                 |                 |                    | B*58:01               | 294.5                 |
| <i>Class II</i> |                 |                    |                       |                       |
| M               | ASFRLFARTRSMWSF | 0.7304             | DRB1*01:01            | 19.2                  |
|                 |                 |                    | DRB1*07:01            | 30.9                  |
|                 |                 |                    | DRB1*08:02            | 53.5                  |
|                 |                 |                    | DRB1*09:01            | 49.9                  |
|                 |                 |                    | DRB1*11:01            | 12.2                  |
|                 |                 |                    | DRB5*01:01            | 16.3                  |
|                 |                 |                    | DPA1*02:01/DPB1*05:01 | 256.2                 |
|                 |                 |                    | DPA1*02:01 DPB1*14:01 | 387.3                 |
| M               | LLQFAYANRRNFLYI | 0.7387             | DRB1*03:01            | 179.8                 |
|                 |                 |                    | DRB1*07:01            | 58.2                  |
|                 |                 |                    | DRB1*08:02            | 225.6                 |
|                 |                 |                    | DRB1*11:01            | 36.2                  |
|                 |                 |                    | DRB1*13:02            | 27.8                  |
|                 |                 |                    | DRB3*02:02            | 46.6                  |
|                 |                 |                    | DRB5*01:01            | 26.3                  |
| S               | AAEIRASANLAATKM | 0.7125             | DRB1*08:02            | 101.3                 |
|                 |                 |                    | DRB1*13:02            | 23.0                  |
|                 |                 |                    | DRB3*02:02            | 52.7                  |
|                 |                 |                    | DQA1*01:02/DQB1*06:02 | 141.5                 |
| S               | ALQIPFAMQMAYRFN | 1.0112             | DPA1*02:01/DPB1*14:01 | 327.4                 |
|                 |                 |                    | DRB1*09:01            | 52.9                  |
|                 |                 |                    | DRB1*12:01            | 159.5                 |
| S               | PYRVVLSFELLHAP  | 0.8161             | DRB1*15:01            | 50.3                  |
|                 |                 |                    | DPA1*02:01/DPB1*01:01 | 79.6                  |
|                 |                 |                    | DPA1*01:03/DPB1*02:01 | 53.3                  |
|                 |                 |                    | DPA1*01:03/DPB1*04:01 | 77.1                  |
| S               | QPVRVVLSFELLHA  | 0.9109             | DPA1*03:01/DPB1*04:02 | 92.9                  |
|                 |                 |                    | DPA1*02:01/DPB1*01:01 | 73.2                  |
|                 |                 |                    | DPA1*01:03/DPB1*02:01 | 50.2                  |
|                 |                 |                    | DPA1*01:03/DPB1*04:01 | 71.4                  |
|                 |                 |                    | DPA1*03:01/DPB1*04:02 | 90.1                  |
|                 |                 |                    | DPA1*02:01/DPB1*05:01 | 211.1                 |

|        |                  |        |                       |       |
|--------|------------------|--------|-----------------------|-------|
| S      | YQPYRVVLSFELLH   | 0.9711 | DPA1*02:01/DPB1*01:01 | 102.2 |
|        |                  |        | DPA1*01:03/DPB1*04:01 | 93.0  |
|        |                  |        | DPA1*03:01/DPB1*04:02 | 127.5 |
|        |                  |        | DPA1*02:01/DPB1*05:01 | 299.3 |
| ORF1ab | ANYIFWRNTNPIQLS  | 1.0311 | DRB1*04:05            | 89.9  |
|        |                  |        | DRB1*07:01            | 35.2  |
|        |                  |        | DRB1*13:02            | 13.5  |
| ORF1ab | FKWDLTAFGLVAEWF  | 0.8059 | DQA1*05:01/DQB1*02:01 | 178.3 |
|        |                  |        | DQA1*03:01/DQB1*03:02 | 425.3 |
|        |                  |        | DQA1*04:01/DQB1*04:02 | 349.3 |
| ORF1ab | HIQWMVMFTPLVPFW  | 0.7238 | DQA1*01:01/DQB1*05:01 | 293.1 |
|        |                  |        | DPA1*02:01/DPB1*01:01 | 116.3 |
|        |                  |        | DPA1*01:03/DPB1*04:01 | 84.6  |
|        |                  |        | DPA1*03:01/DPB1*04:02 | 135.4 |
| ORF1ab | IINLVQMAPISAMVR  | 0.7682 | DRB1*01:01            | 12.8  |
|        |                  |        | DRB1*08:02            | 118.8 |
|        |                  |        | DRB4*01:01            | 54.7  |
| ORF1ab | INLVQMAPISAMVRM  | 0.9037 | DRB1*12:01            | 176.9 |
|        |                  |        | DRB4*01:01            | 57.1  |
|        |                  |        | DQA1*01:02/DQB1*06:02 | 116.5 |
|        |                  |        | DPA1*02:01/DPB1*14:01 | 398.6 |
| ORF1ab | IVFMCVEYCPIFFIT  | 1.0267 | DPA1*02:01/DPB1*01:01 | 116.2 |
|        |                  |        | DPA1*01:03/DPB1*02:01 | 53.9  |
|        |                  |        | DPA1*01:03/DPB1*04:01 | 70.9  |
|        |                  |        | DPA1*03:01/DPB1*04:02 | 144.9 |
| ORF1ab | IVTALRANSVAVKLQN | 0.7692 | DRB1*08:02            | 115.9 |
|        |                  |        | DRB1*13:02            | 9.4   |
|        |                  |        | DRB3*02:02            | 19.5  |
|        |                  |        | DPA1*02:01/DPB1*14:01 | 408.7 |
| ORF1ab | KGRLLIIRENNRVVIS | 0.7821 | DRB1*12:01            | 170.9 |
|        |                  |        | DRB1*13:02            | 9.5   |
|        |                  |        | DRB1*15:01            | 48.2  |
|        |                  |        | DRB4*01:01            | 58.8  |
| ORF1ab | KSAFYILPSIISNEK  | 0.7169 | DRB1*01:01            | 9.3   |
|        |                  |        | DRB1*04:01            | 49.3  |
|        |                  |        | DRB1*04:05            | 47.5  |
|        |                  |        | DRB1*08:02            | 96.3  |
|        |                  |        | DRB1*01:01            | 8.8   |
| ORF1ab | LIVTALRANSVAVKLQ | 0.7473 | DRB1*07:01            | 39.2  |
|        |                  |        | DRB4*01:01            | 78.6  |
|        |                  |        | DQA1*01:02/DQB1*06:02 | 142.5 |
|        |                  |        | DPA1*02:01/DPB1*14:01 | 368.3 |
| ORF1ab | NLPFKLTCATTRQVV  | 1.1632 | DRB1*07:01            | 35.9  |
|        |                  |        | DRB1*09:01            | 58.6  |
|        |                  |        | DRB5*01:01            | 23.9  |
| ORF1ab | PASRELKVTFPPDLN  | 1.0155 | DPA1*02:01/DPB1*01:01 | 76.9  |
|        |                  |        | DPA1*01:03/DPB1*02:01 | 48.9  |
|        |                  |        | DPA1*01:03/DPB1*04:01 | 64.3  |
|        |                  |        | DPA1*03:01/DPB1*04:02 | 149.5 |
| ORF1ab | PFAMGIIAMSAFAMM  | 0.9834 | DRB1*01:01            | 12.3  |
|        |                  |        | DRB1*09:01            | 57.6  |
| ORF1ab | QMNLKYAISAKNRAR  | 1.5044 | DQA1*05:01/DQB1*03:01 | 45.6  |
|        |                  |        | DRB1*01:01            | 14.9  |

|        |                 |        |                       |       |
|--------|-----------------|--------|-----------------------|-------|
|        |                 |        | DRB1*04:01            | 56.9  |
|        |                 |        | DRB1*08:02            | 49.1  |
|        |                 |        | DRB1*09:01            | 45.2  |
|        |                 |        | DRB1*11:01            | 22.1  |
|        |                 |        | DRB3*02:02            | 84.9  |
|        |                 |        | DPA1*02:01/DPB1*14:01 | 158.3 |
| ORF1ab | QQKLALGGSVAIKIT | 1.2533 | DRB1*01:01            | 12.6  |
|        |                 |        | DRB1*07:01            | 23.4  |
|        |                 |        | DRB1*09:01            | 32.3  |
|        |                 |        | DQA1*05:01/DQB1*03:01 | 42.9  |
| ORF1ab | RFKESPFELEDFIPM | 1.2101 | DPA1*02:01/DPB1*01:01 | 74.0  |
|        |                 |        | DPA1*01:03/DPB1*02:01 | 65.9  |
|        |                 |        | DPA1*01:03/DPB1*04:01 | 81.9  |
|        |                 |        | DPA1*03:01/DPB1*04:02 | 130.6 |
| ORF1ab | SAFAMMFVKHKHAFL | 0.7305 | DRB1*08:02            | 110.4 |
|        |                 |        | DRB1*11:01            | 18.3  |
|        |                 |        | DRB1*15:01            | 50.9  |
|        |                 |        | DRB4*01:01            | 79.2  |
|        |                 |        | DRB5*01:01            | 15.1  |
| ORF1ab | SFLAHIQWMVMFTPL | 0.8215 | DPA1*02:01/DPB1*01:01 | 103.9 |
|        |                 |        | DPA1*01:03/DPB1*02:01 | 47.8  |
|        |                 |        | DPA1*01:03/DPB1*04:01 | 70.7  |
|        |                 |        | DPA1*03:01/DPB1*04:02 | 140.6 |
| ORF1ab | SIGFDYVYNPFMIDV | 1.0823 | DPA1*02:01/DPB1*01:01 | 108.9 |
|        |                 |        | DPA1*01:03/DPB1*02:01 | 47.1  |
|        |                 |        | DPA1*01:03/DPB1*04:01 | 81.9  |
|        |                 |        | DPA1*03:01/DPB1*04:02 | 137.6 |
| ORF1ab | TEETFKLSYGIATVR | 0.8859 | DRB1*01:01            | 8.7   |
|        |                 |        | DRB1*07:01            | 21.8  |
|        |                 |        | DRB1*09:01            | 25.9  |
| ORF1ab | VLVQSTQWSLFFFLY | 0.7309 | DPA1*02:01/DPB1*01:01 | 77.0  |
|        |                 |        | DPA1*01:03/DPB1*02:01 | 35.3  |
|        |                 |        | DPA1*01:03/DPB1*04:01 | 42.3  |
|        |                 |        | DPA1*03:01/DPB1*04:02 | 93.1  |
| ORF1ab | VQSTQWSLFFFLYEN | 0.7509 | DPA1*02:01/DPB1*01:01 | 107.1 |
|        |                 |        | DPA1*01:03/DPB1*02:01 | 49.9  |
|        |                 |        | DPA1*03:01/DPB1*04:02 | 129.8 |
| ORF1ab | WLIINLVQMAPISAM | 0.9389 | DRB1*12:01            | 130.6 |
|        |                 |        | DRB4*01:01            | 65.9  |
|        |                 |        | DQA1*01:02/DQB1*06:02 | 139.6 |
| ORF1ab | YFNMVYMPASWVMRI | 0.7244 | DRB1*01:01            | 8.3   |
|        |                 |        | DRB1*04:05            | 80.2  |
|        |                 |        | DRB1*07:01            | 38.2  |
|        |                 |        | DRB1*09:01            | 37.4  |
|        |                 |        | DRB1*12:01            | 184.5 |
|        |                 |        | DRB1*15:01            | 30.1  |
| ORF3   | KKRWQLALSkgVHFV | 0.8172 | DRB1*01:01            | 9.2   |
|        |                 |        | DRB1*07:01            | 11.6  |
|        |                 |        | DRB1*08:02            | 200.3 |
|        |                 |        | DRB1*09:01            | 17.9  |
|        |                 |        | DRB1*11:01            | 43.1  |
|        |                 |        | DRB1*12:01            | 119.6 |
|        |                 |        | DRB1*13:02            | 30.0  |



|      |                 |        |                       |       |
|------|-----------------|--------|-----------------------|-------|
|      |                 |        | DRB1*15:01            | 34.2  |
|      |                 |        | DRB4*01:01            | 79.8  |
|      |                 |        | DRB5*01:01            | 18.4  |
| ORF6 | MFHLVDFQVTIAEIL | 1.0366 | DQA1*05:01/DQB1*02:01 | 192.0 |
|      |                 |        | DQA1*01:01/DQB1*05:01 | 292.1 |
|      |                 |        | DPA1*02:01/DPB1*01:01 | 108.3 |
|      |                 |        | DPA1*01:03/DPB1*04:01 | 100.7 |
| ORF7 | VKHVYQLRARSVSPK | 1.0865 | DRB1*01:01            | 14.3  |
|      |                 |        | DRB1*08:02            | 150.6 |
|      |                 |        | DRB1*11:01            | 38.3  |
|      |                 |        | DRB4*01:01            | 86.6  |
| ORF7 | NKFALTCFSTQFAFA | 1.1728 | DPA1*02:01/DPB1*01:01 | 50.9  |
|      |                 |        | DPA1*01:03/DPB1*02:01 | 29.1  |
|      |                 |        | DPA1*01:03/DPB1*04:01 | 35.9  |
|      |                 |        | DPA1*03:01/DPB1*04:02 | 80.2  |
|      |                 |        | DPA1*02:01/DPB1*05:01 | 273.4 |
| ORF8 | SKWYIRVGARKSAPL | 0.8829 | DRB1*01:01            | 13.7  |
|      |                 |        | DRB1*08:02            | 87.8  |
|      |                 |        | DRB1*09:01            | 50.7  |
|      |                 |        | DRB1*11:01            | 15.3  |
|      |                 |        | DRB5*01:01            | 8.8   |

612

613

614

615

616 Table 2. Top predicted B cell epitopes.

| Peptide                  | Residues  | Bepipred Score <sup>a</sup> | DiscoTope Score <sup>a</sup> |
|--------------------------|-----------|-----------------------------|------------------------------|
| DEVRNIAPGNTGKIADTNTKLPDD | 405-428   | 0.715                       | -5.71                        |
| NLDSKVGGSYN              | 440-450   | 0.577                       | -5.77                        |
| GFNPTVGYNP               | 496-507   | 1.01                        | -5.73                        |
| DIADTT                   | 568-573   | 0.853                       | -5.55                        |
| PPIKD                    | 792-796   | 0.936                       | -3.28                        |
| VYDPLQPELDSF             | 1138-1149 | 0.747                       | -4.12                        |

617 <sup>a</sup>Reported scores represent the average calculated across all amino acids.

618

**Figure 1.**

**A.**

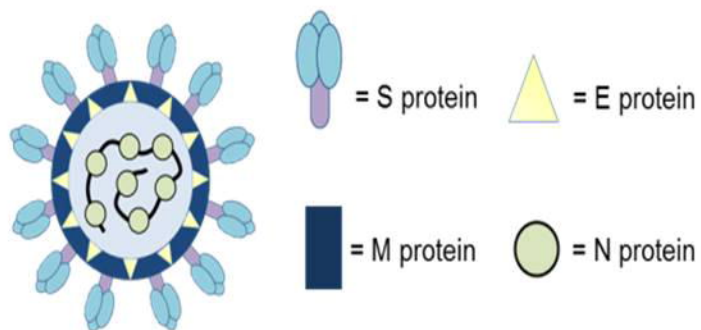

**B.**

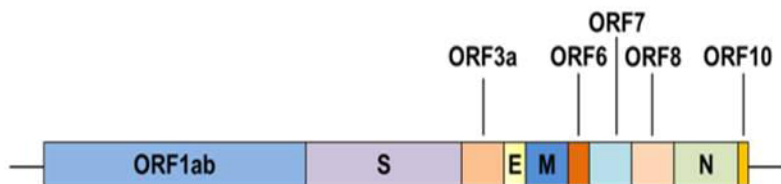

**C.**

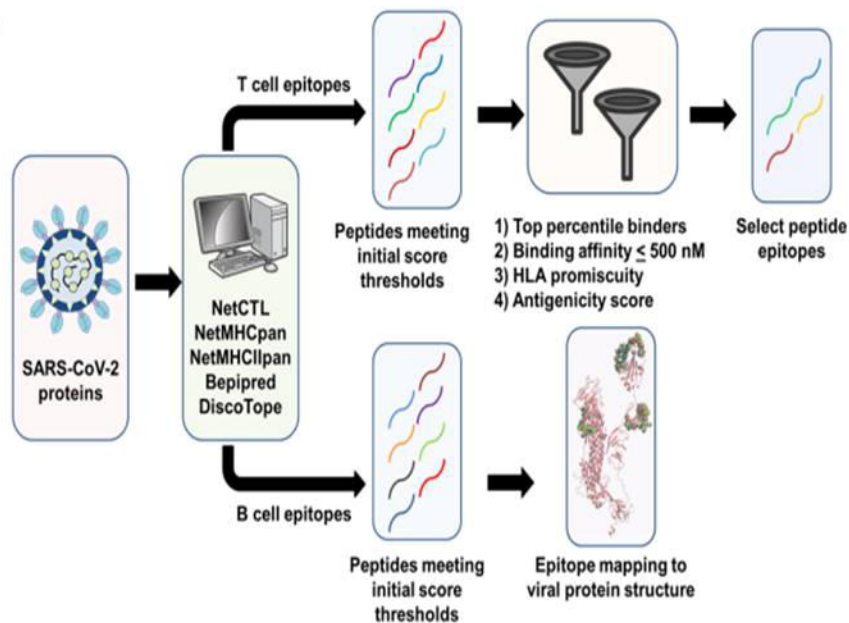

**D.**

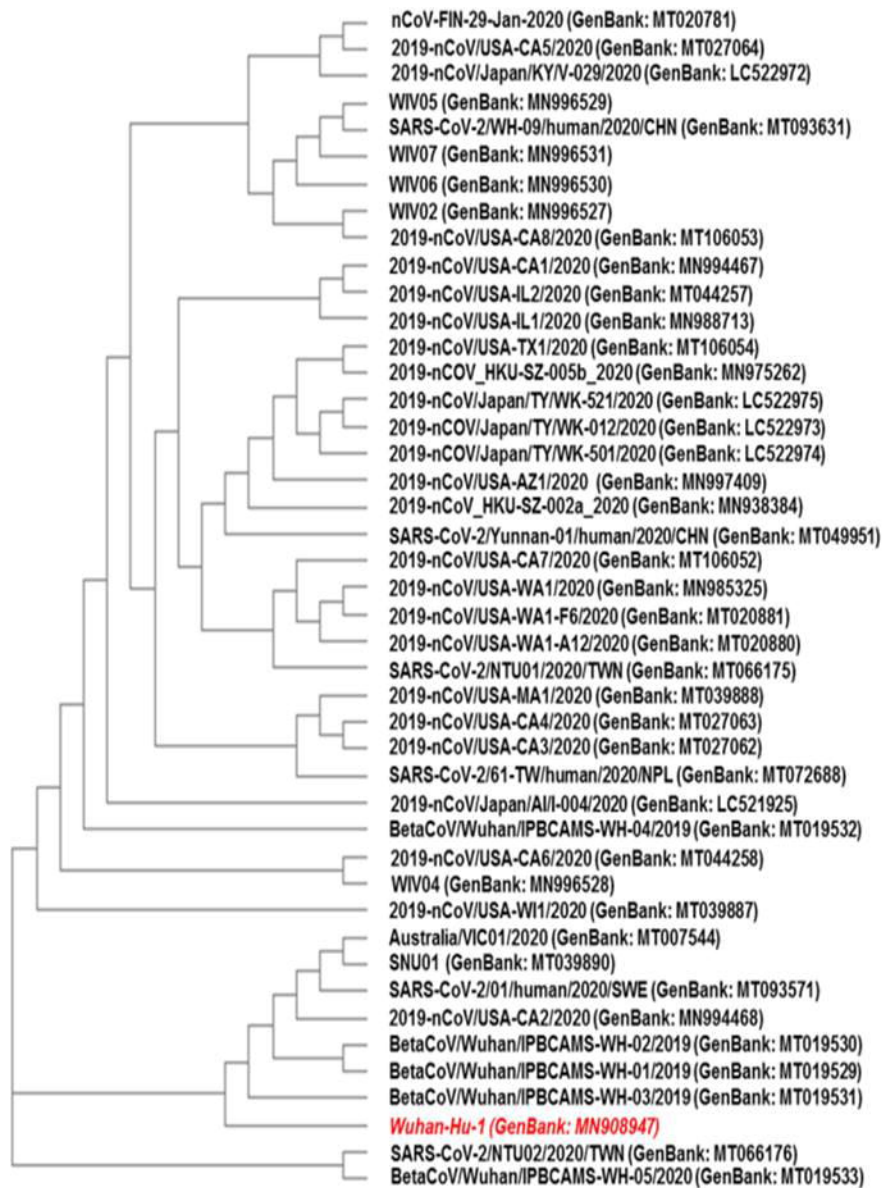

**Figure 2.**

**A.**

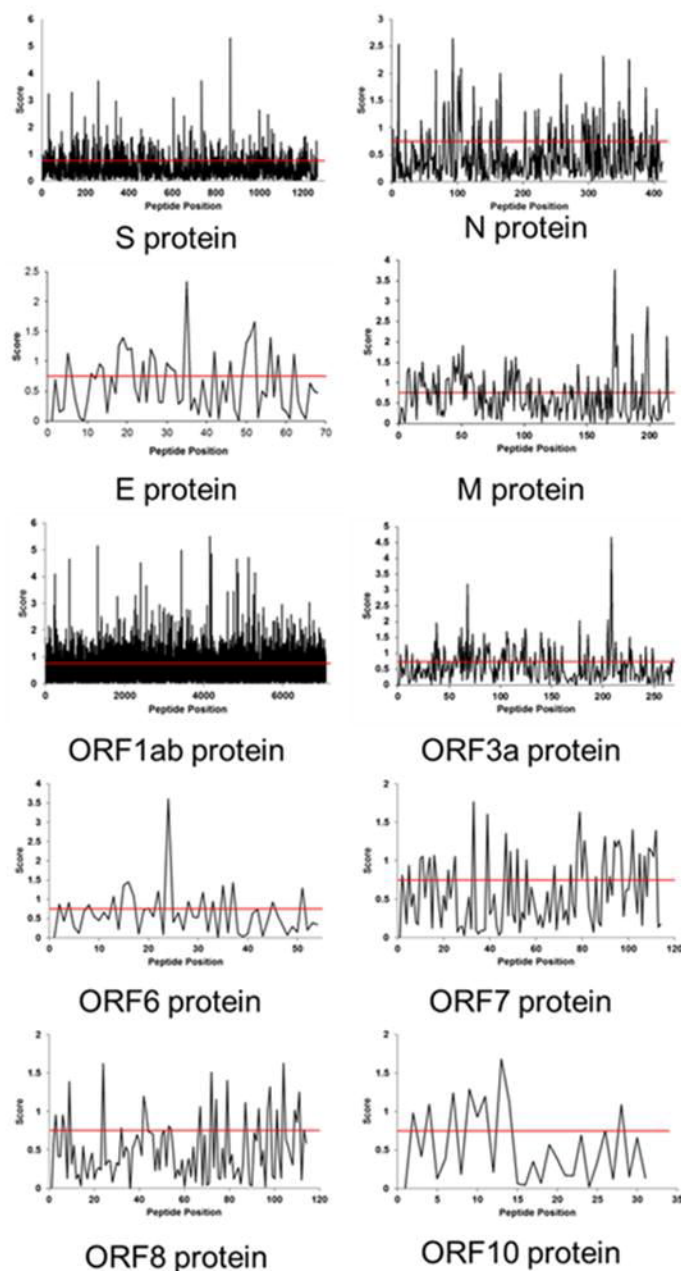

**B.**

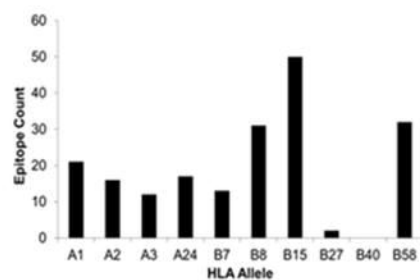

**C.**

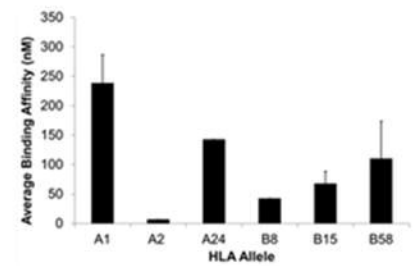

**D.**

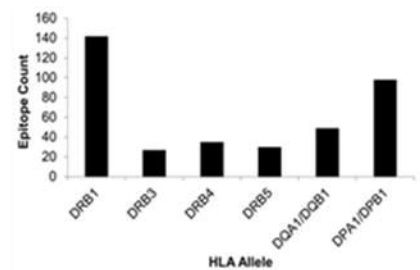

**E.**

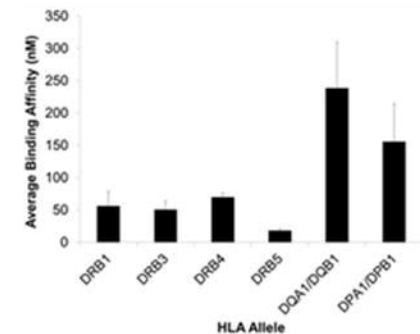

Figure 3.

A.

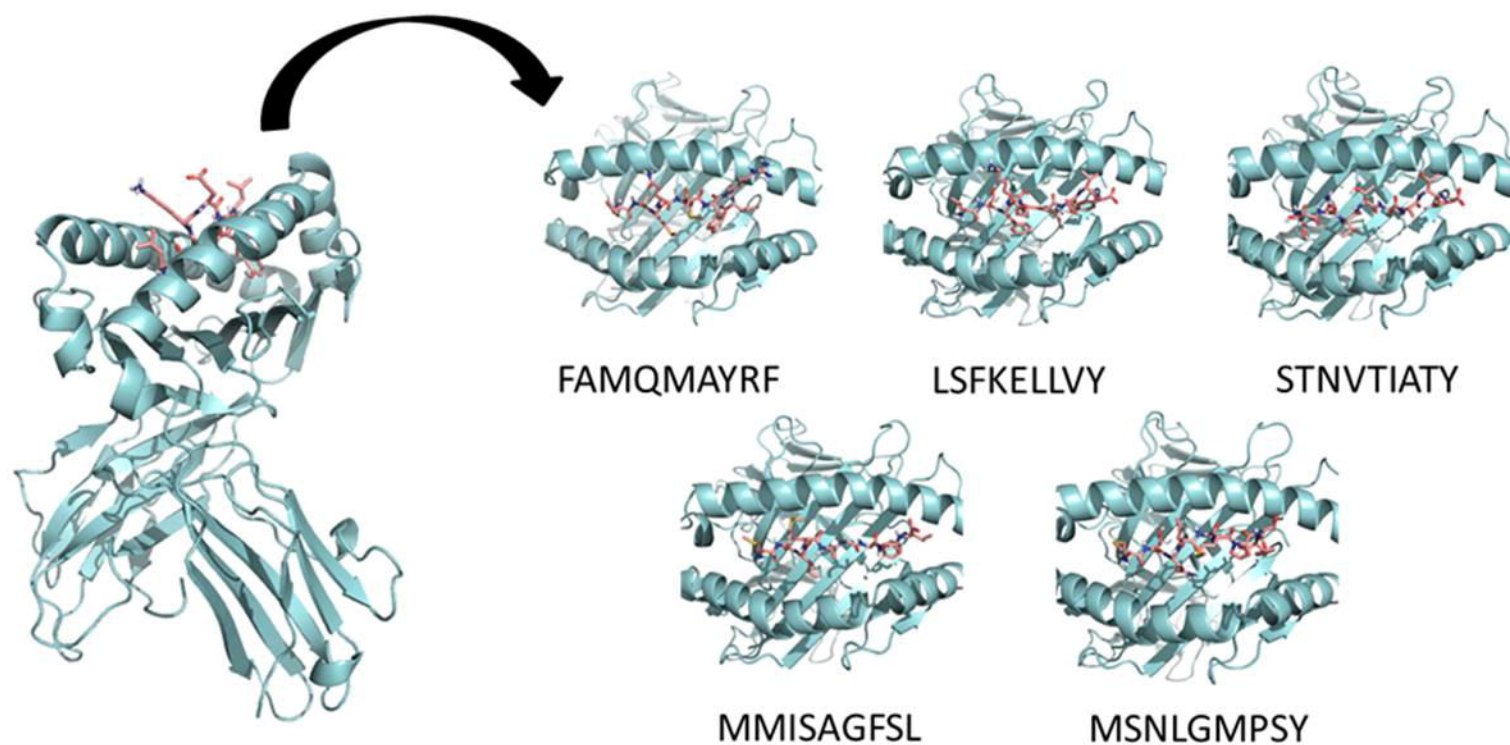

B.

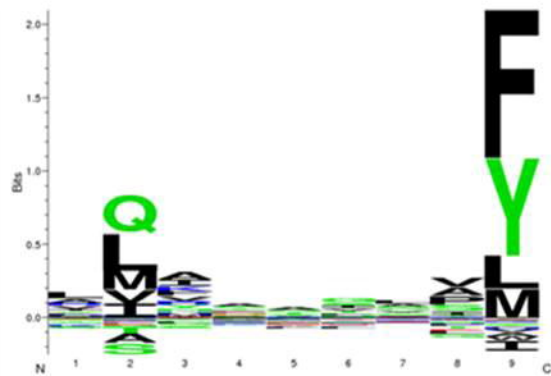

C.

| Peptide Sequence | Template Modeling Score | Interaction Similarity Score |
|------------------|-------------------------|------------------------------|
| FAMQMAYRF        | 0.992                   | 202.0                        |
| LSFKELLVY        | 0.963                   | 238.0                        |
| STNVTIATY        | 0.994                   | 200.0                        |
| MMISAGFSL        | 0.984                   | 225.0                        |
| MSNLGMPSY        | 0.963                   | 234.0                        |



**Figure 4.**

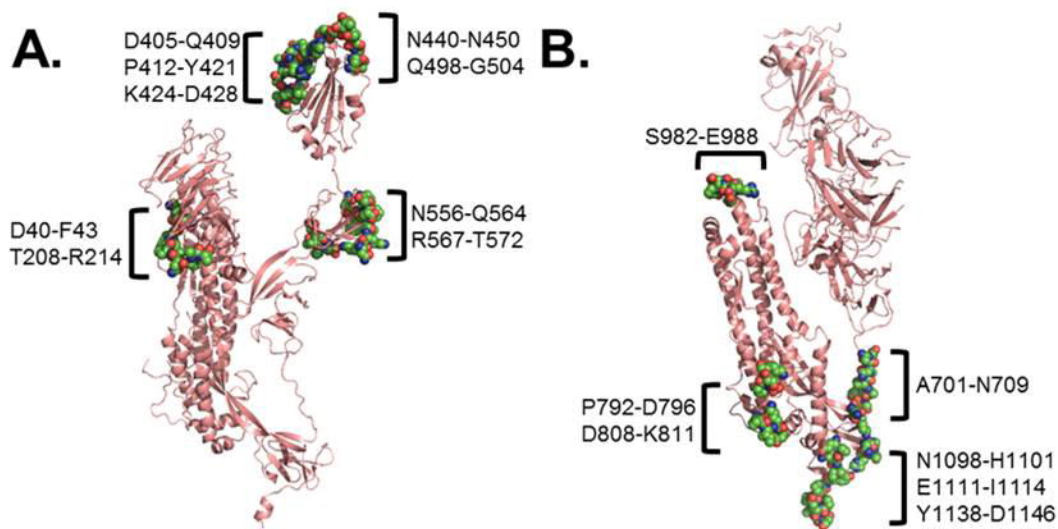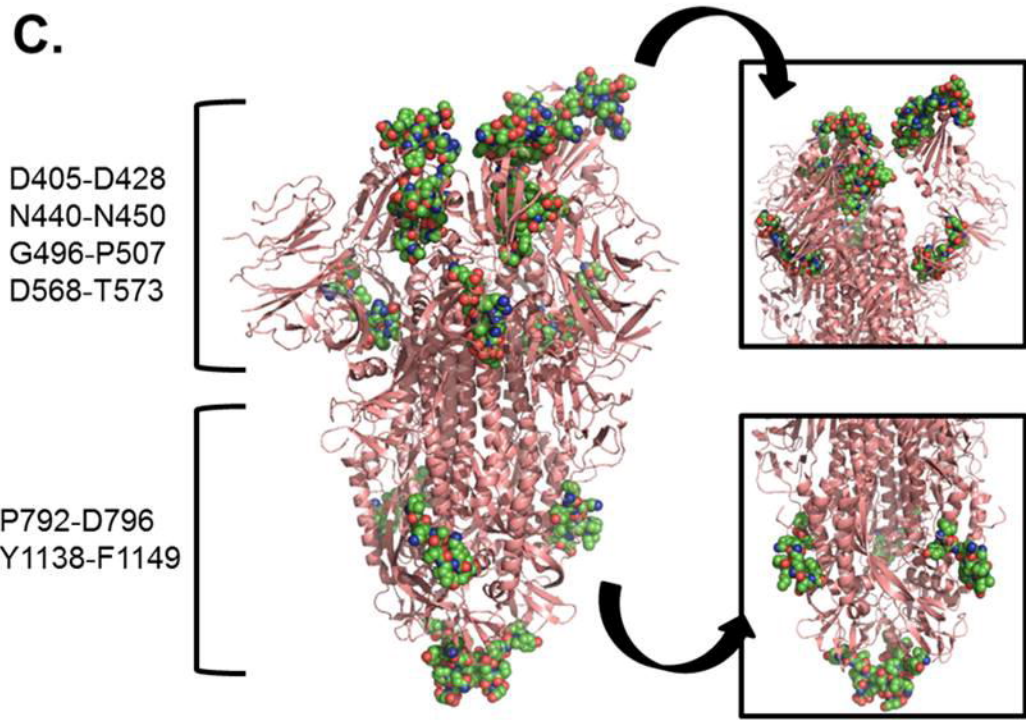

Source: http://biorxiv.org/content/10.1101/2020.05.14.093757v1.full.pdf
